# Supplementary material
Source: PubMed Central journal article supplement (PMC4849277)
Supplement: NIHMS779923-supplement-01.pdf [file NIHMS779923-supplement-01.pdf]

**Online Table. Included studies with number of reported delayed hemorrhagic complications.**

| Delayed aneurysms ruptures             |           | Delayed intraparenchymal hemorrhages                       |            |
|----------------------------------------|-----------|------------------------------------------------------------|------------|
| Study Author, Year                     | n         | Study Author, Year                                         | n          |
| Becske T. Radiology 2013.              | 1         | Becske T. Radiology 2013.                                  | 5          |
| Berge J. AJNR 2012.                    | 3         | Briganti F. Neuroradiology 2012.                           | 2          |
| Briganti F. Neuroradiology 2012.       | 7         | Brinjikji INTREPED sub analysis. AJNR 2015 ahead of print. | 20         |
| Cebral JR. AJNR 2011.                  | 3         | Brinjikji W. AJNR 2015.                                    | 1          |
| Chalouhi N. AJNR 2014.                 | 1         | Chalouhi N. J Neurointerv Surg 2014.                       | 1          |
| Chow M. AJNR 2012.                     | 1         | Chalouhi N. AJNR 2014.                                     | 5          |
| Chalouhi N. AJNR 2013.                 | 1         | Chalouhi N. Stroke 2013.                                   | 2          |
| Cirillo L. Interv 2012.                | 1         | Chalouhi N. Clinical Neurology and Neurosurgery 2014.      | 2          |
| Colby GP. J Neurointerv Surg 2013.     | 1         | Cinar C. Diagn Interv Radiol 2013.                         | 1          |
| Cruz JP. AJNR 2013.                    | 1         | Cirillo L. Interv 2012.                                    | 1          |
| De Vries. Stroke 2013.                 | 1         | Cruz JP. AJNR 2012.                                        | 4          |
| Fischer S. Neuroradiology 2012.        | 1         | De Vries. Stroke 2013.                                     | 1          |
| Gascou G. AJNR 2015.                   | 2         | Delgado Almandoz JE. J Neurointerv Surg 2013.              | 4          |
| Hampton T. J Neurointerv Surg 2011.    | 1         | Delgado Almandoz JE. AJNR 2014.                            | 1          |
| Kan P. Neurosurgery 2012.              | 1         | Fischer S. Neuroradiology 2012.                            | 3          |
| Kulcsar Z. Acta Neurochir (Wien) 2012. | 1         | Hassan Akbari S. J Neurointerv Surg 2013.                  | 3          |
| Kulcsar. EJMINT 2012. Delayed          | 14        | Hu YC. J Neurosurg 2014.                                   | 3          |
| Kulcsar Z. AJNR 2011.                  | 13        | Kulcsar. EJMINT 2012. Delayed                              | 14         |
| Kuzmik GA. J Neurointerv Surg 2013.    | 1         | Lin LM. Surg Neurol Int 2013.                              | 1          |
| Lubicz B. World Neurosurg 2011.        | 1         | Lubicz B. AJNR 2015.                                       | 1          |
| Lubicz B. Stroke 2010.                 | 1         | McAuliffe W. AJNR 2012.                                    | 1          |
| Lubicz B. AJNR 2015.                   | 1         | Meckel S. Neurosurgery 2013.                               | 1          |
| McAuliffe W. AJNR 2012. (ruptured)     | 2         | Mitha AP. Heart Lung Circul 2015.                          | 1          |
| Monteith SJ. J Neurosurg 2014.         | 1         | Monteith SJ. J Neurosurg 2014.                             | 1          |
| Mustafa W. Interv 2010.                | 1         | O'Kelly CJ. AJNR 2013.                                     | 4          |
| Nerva JD. J Neurointerv Surg 2015.     | 1         | Oran I. J Neurointerv Surg 2015.                           | 2          |
| O'Kelly CJ. AJNR 2013.                 | 3         | Piano M. J Neurosurg 2013.                                 | 1          |
| Piano M. J Neurosurg 2013.             | 1         | Saatci I. AJNR 2012.                                       | 2          |
| Saatci I. AJNR 2012.                   | 1         | Tanweer O. AJNR 2014.                                      | 1          |
| Siddiqui AH. J Neurosurg 2012.         | 2         | Tomas C. Neuroradiology 2014.                              | 4          |
| Toma AK. Br J Neurosurg 2013.          | 2         | Velat GJ. J Neurointerv Surg 2012.                         | 1          |
| Velioglu M. Neuroradiology 2012.       | 5         | Wakhloo AK. AJNR 2015.                                     | 3          |
| Wakhloo AK. AJNR 2015.                 | 1         | Yu SC. Radiology 2012.                                     | 3          |
| Yu SC. Radiology 2012.                 | 2         | Zanaty M. Stroke 2014.                                     | 1          |
| Zanaty M. Stroke 2014.                 | 1         | <b>Total</b>                                               | <b>101</b> |
| <b>Total</b>                           | <b>81</b> |                                                            |            |
